# Supplementary material for: Global Genetic Variations Predict Brain Response to Faces
Source: PubMed Central journal article supplement (PMC4133042; doi:10.1371/journal.pgen.1004523), 2014-08-14

# Ambiguous Faces

# Angry Faces

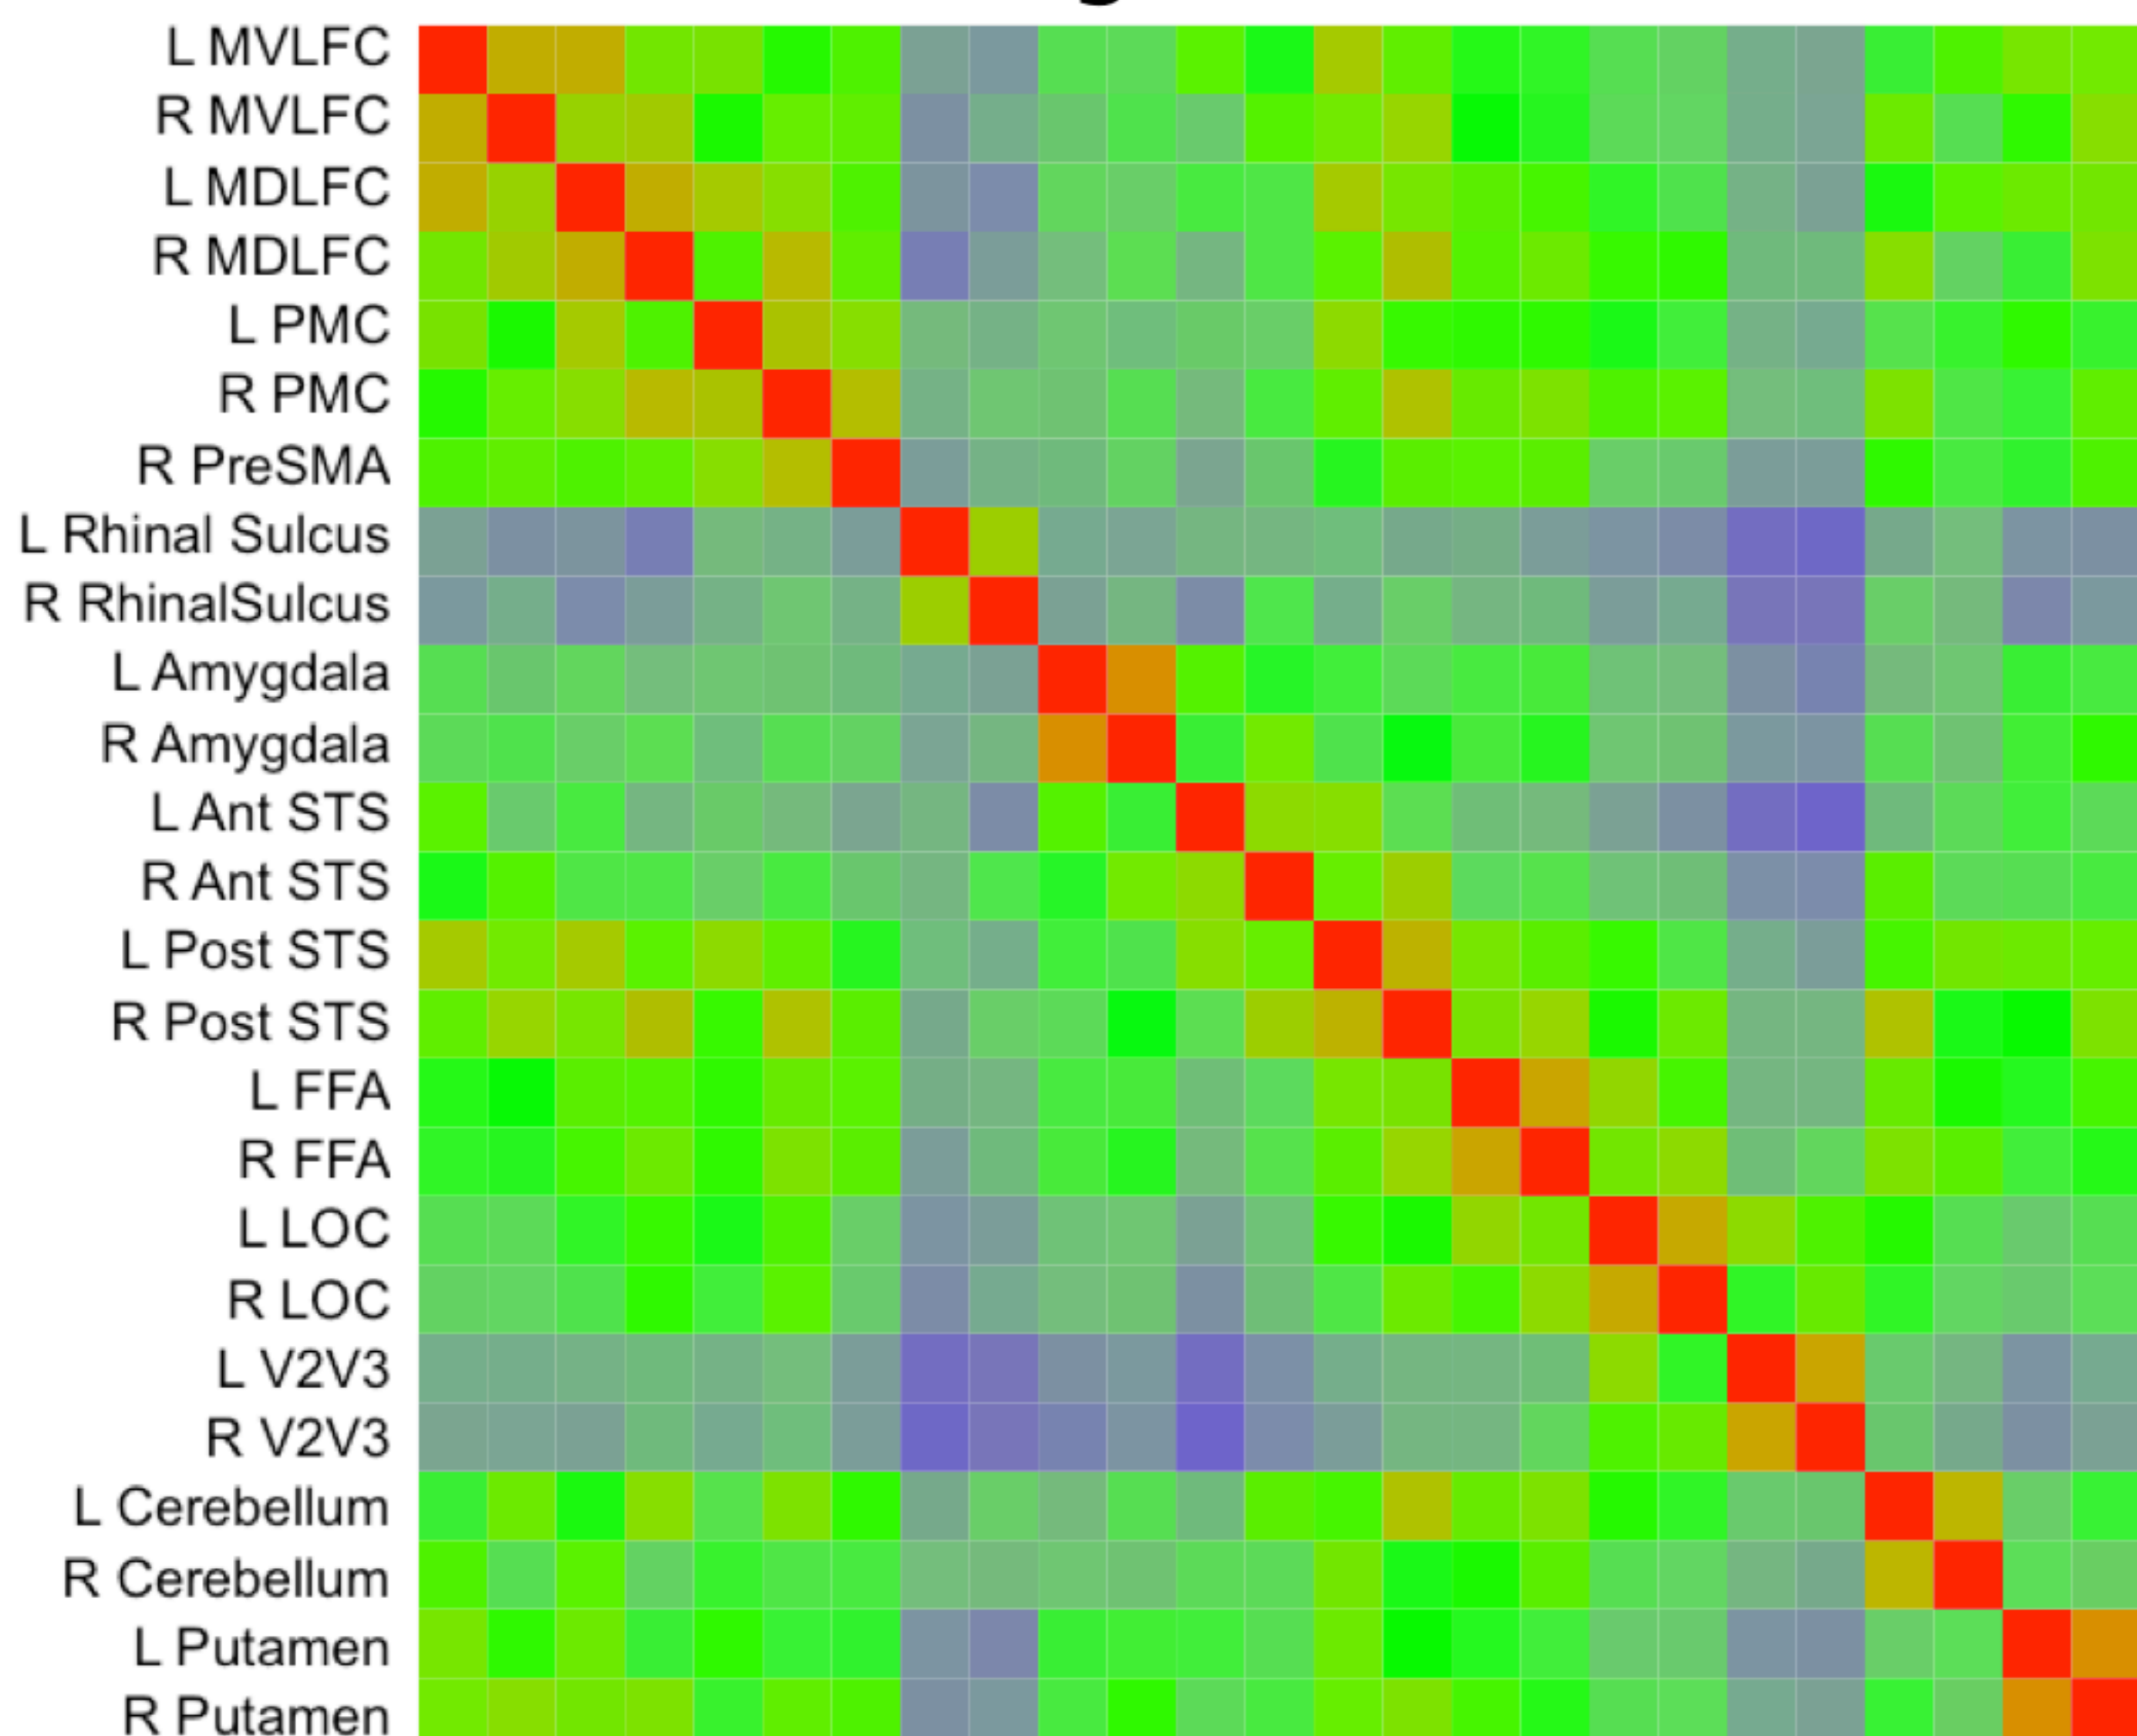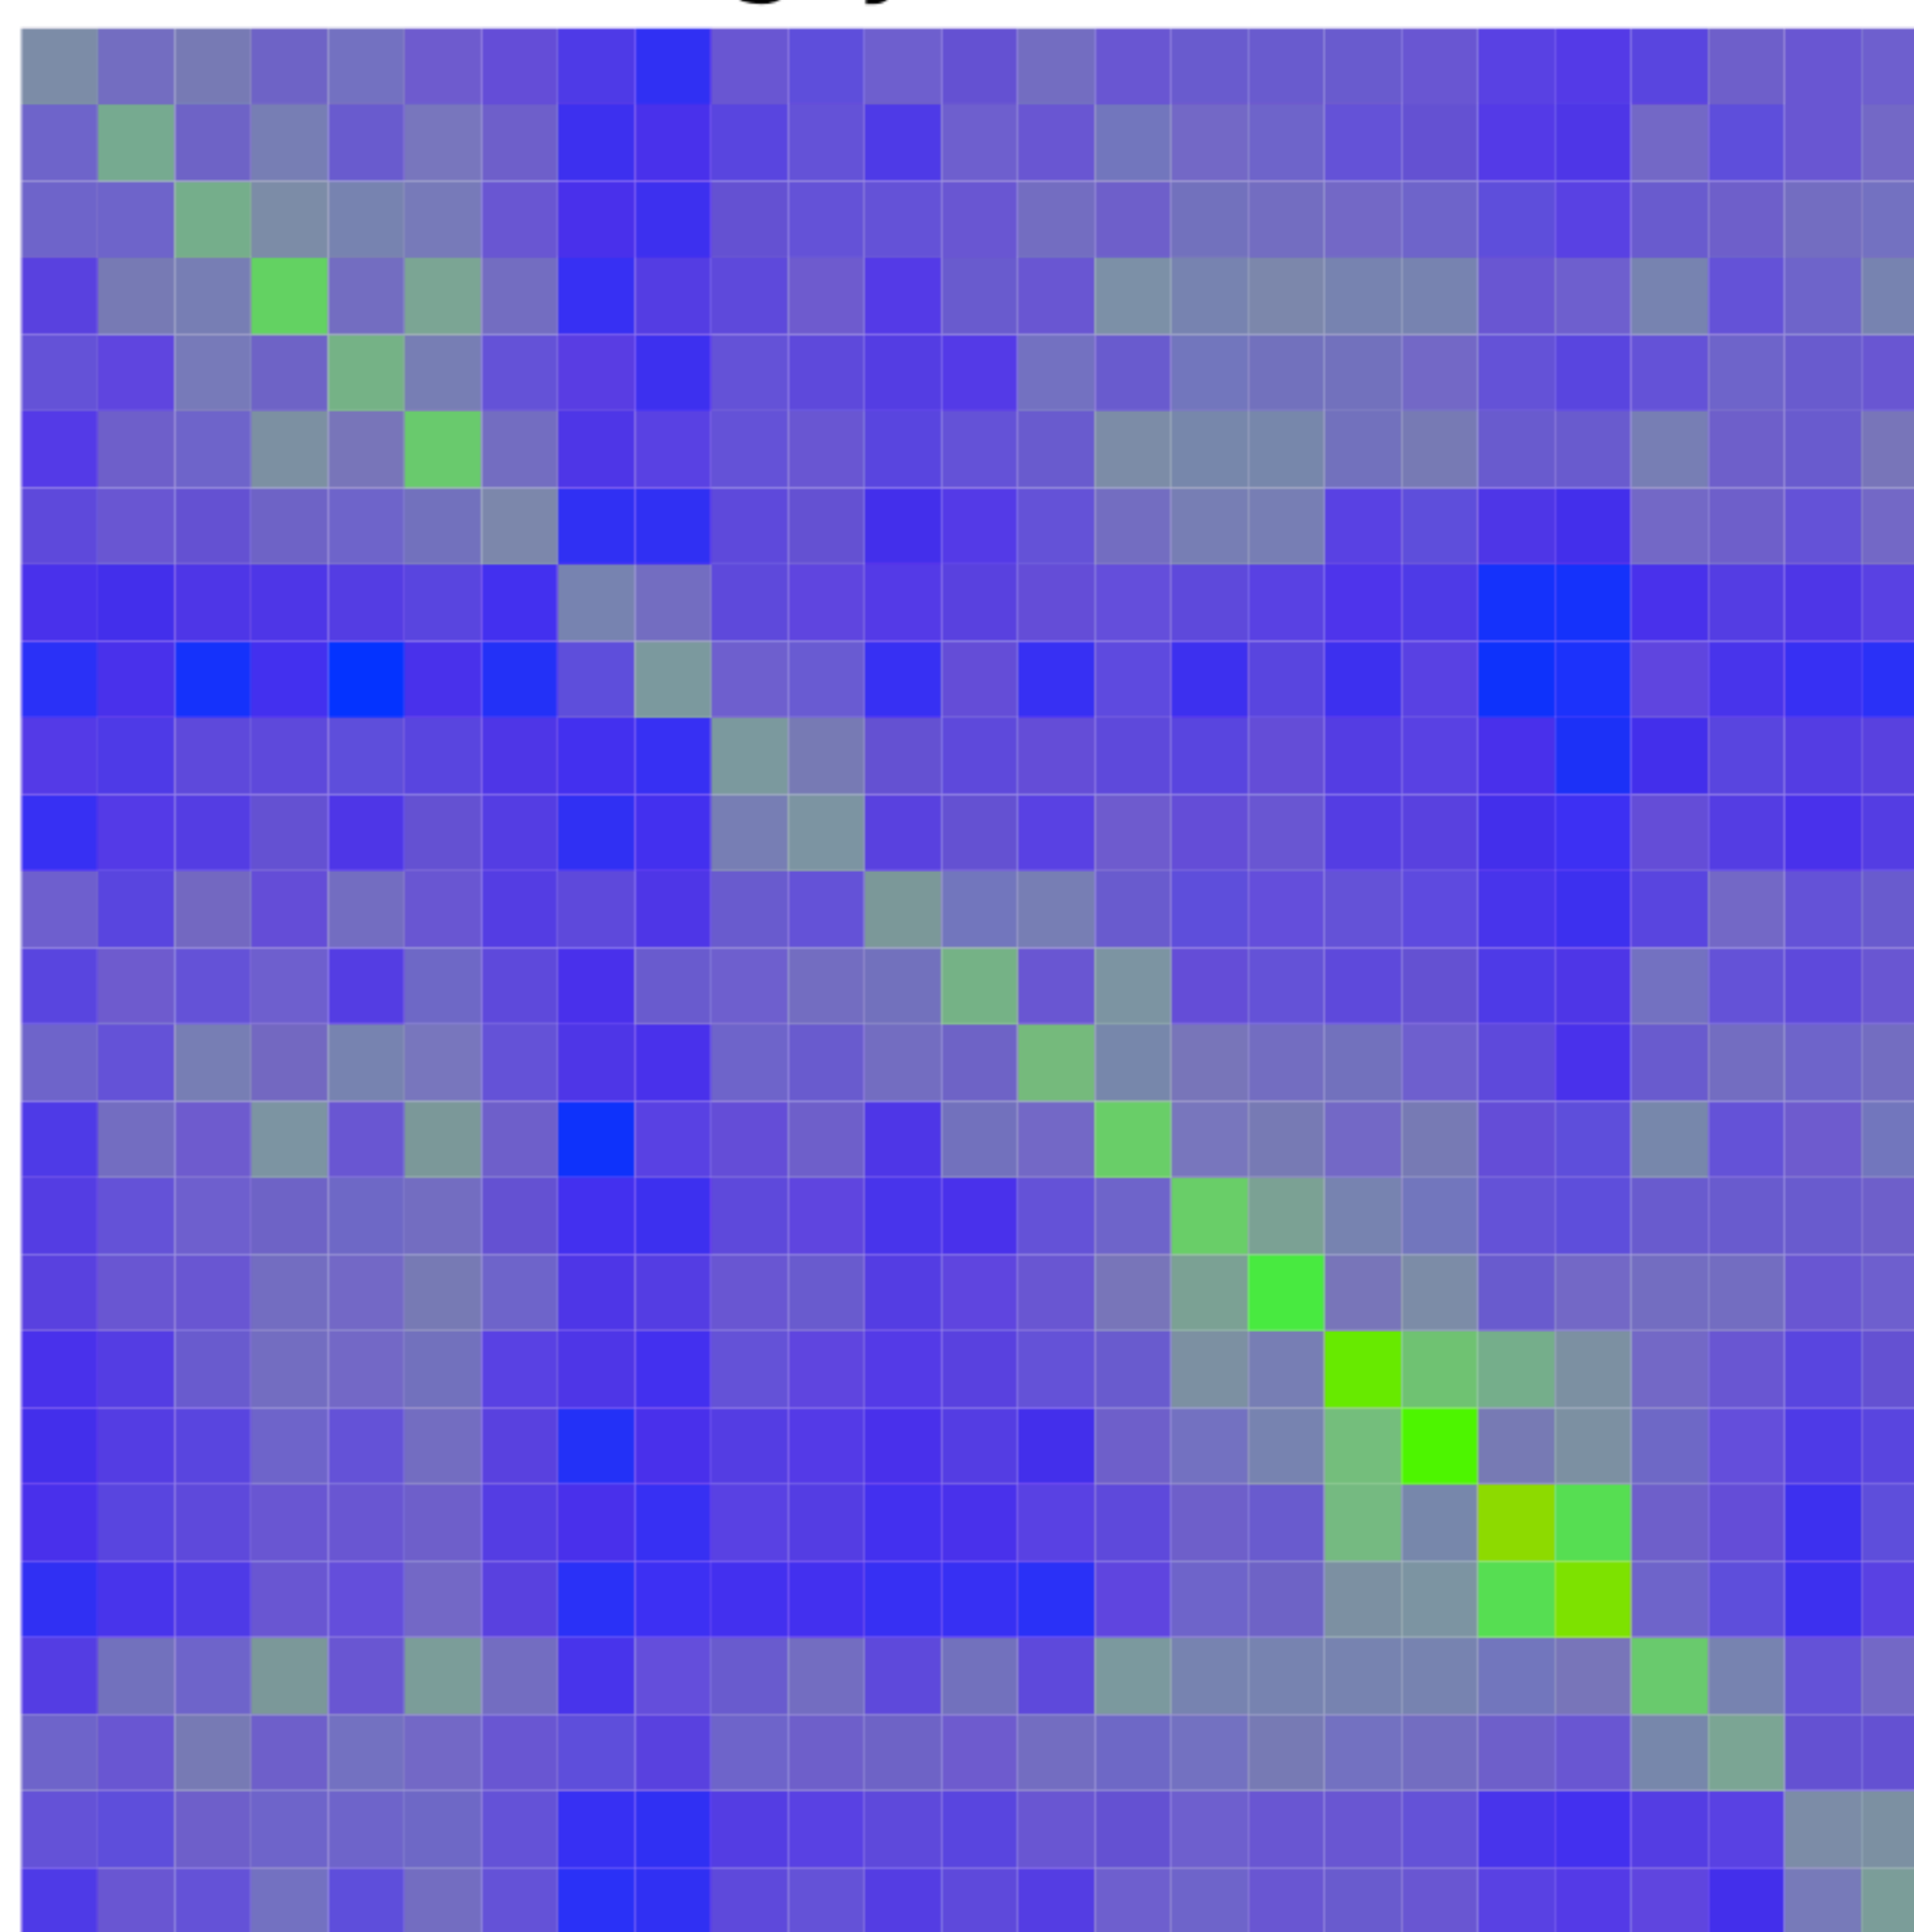

Ambiguous Faces

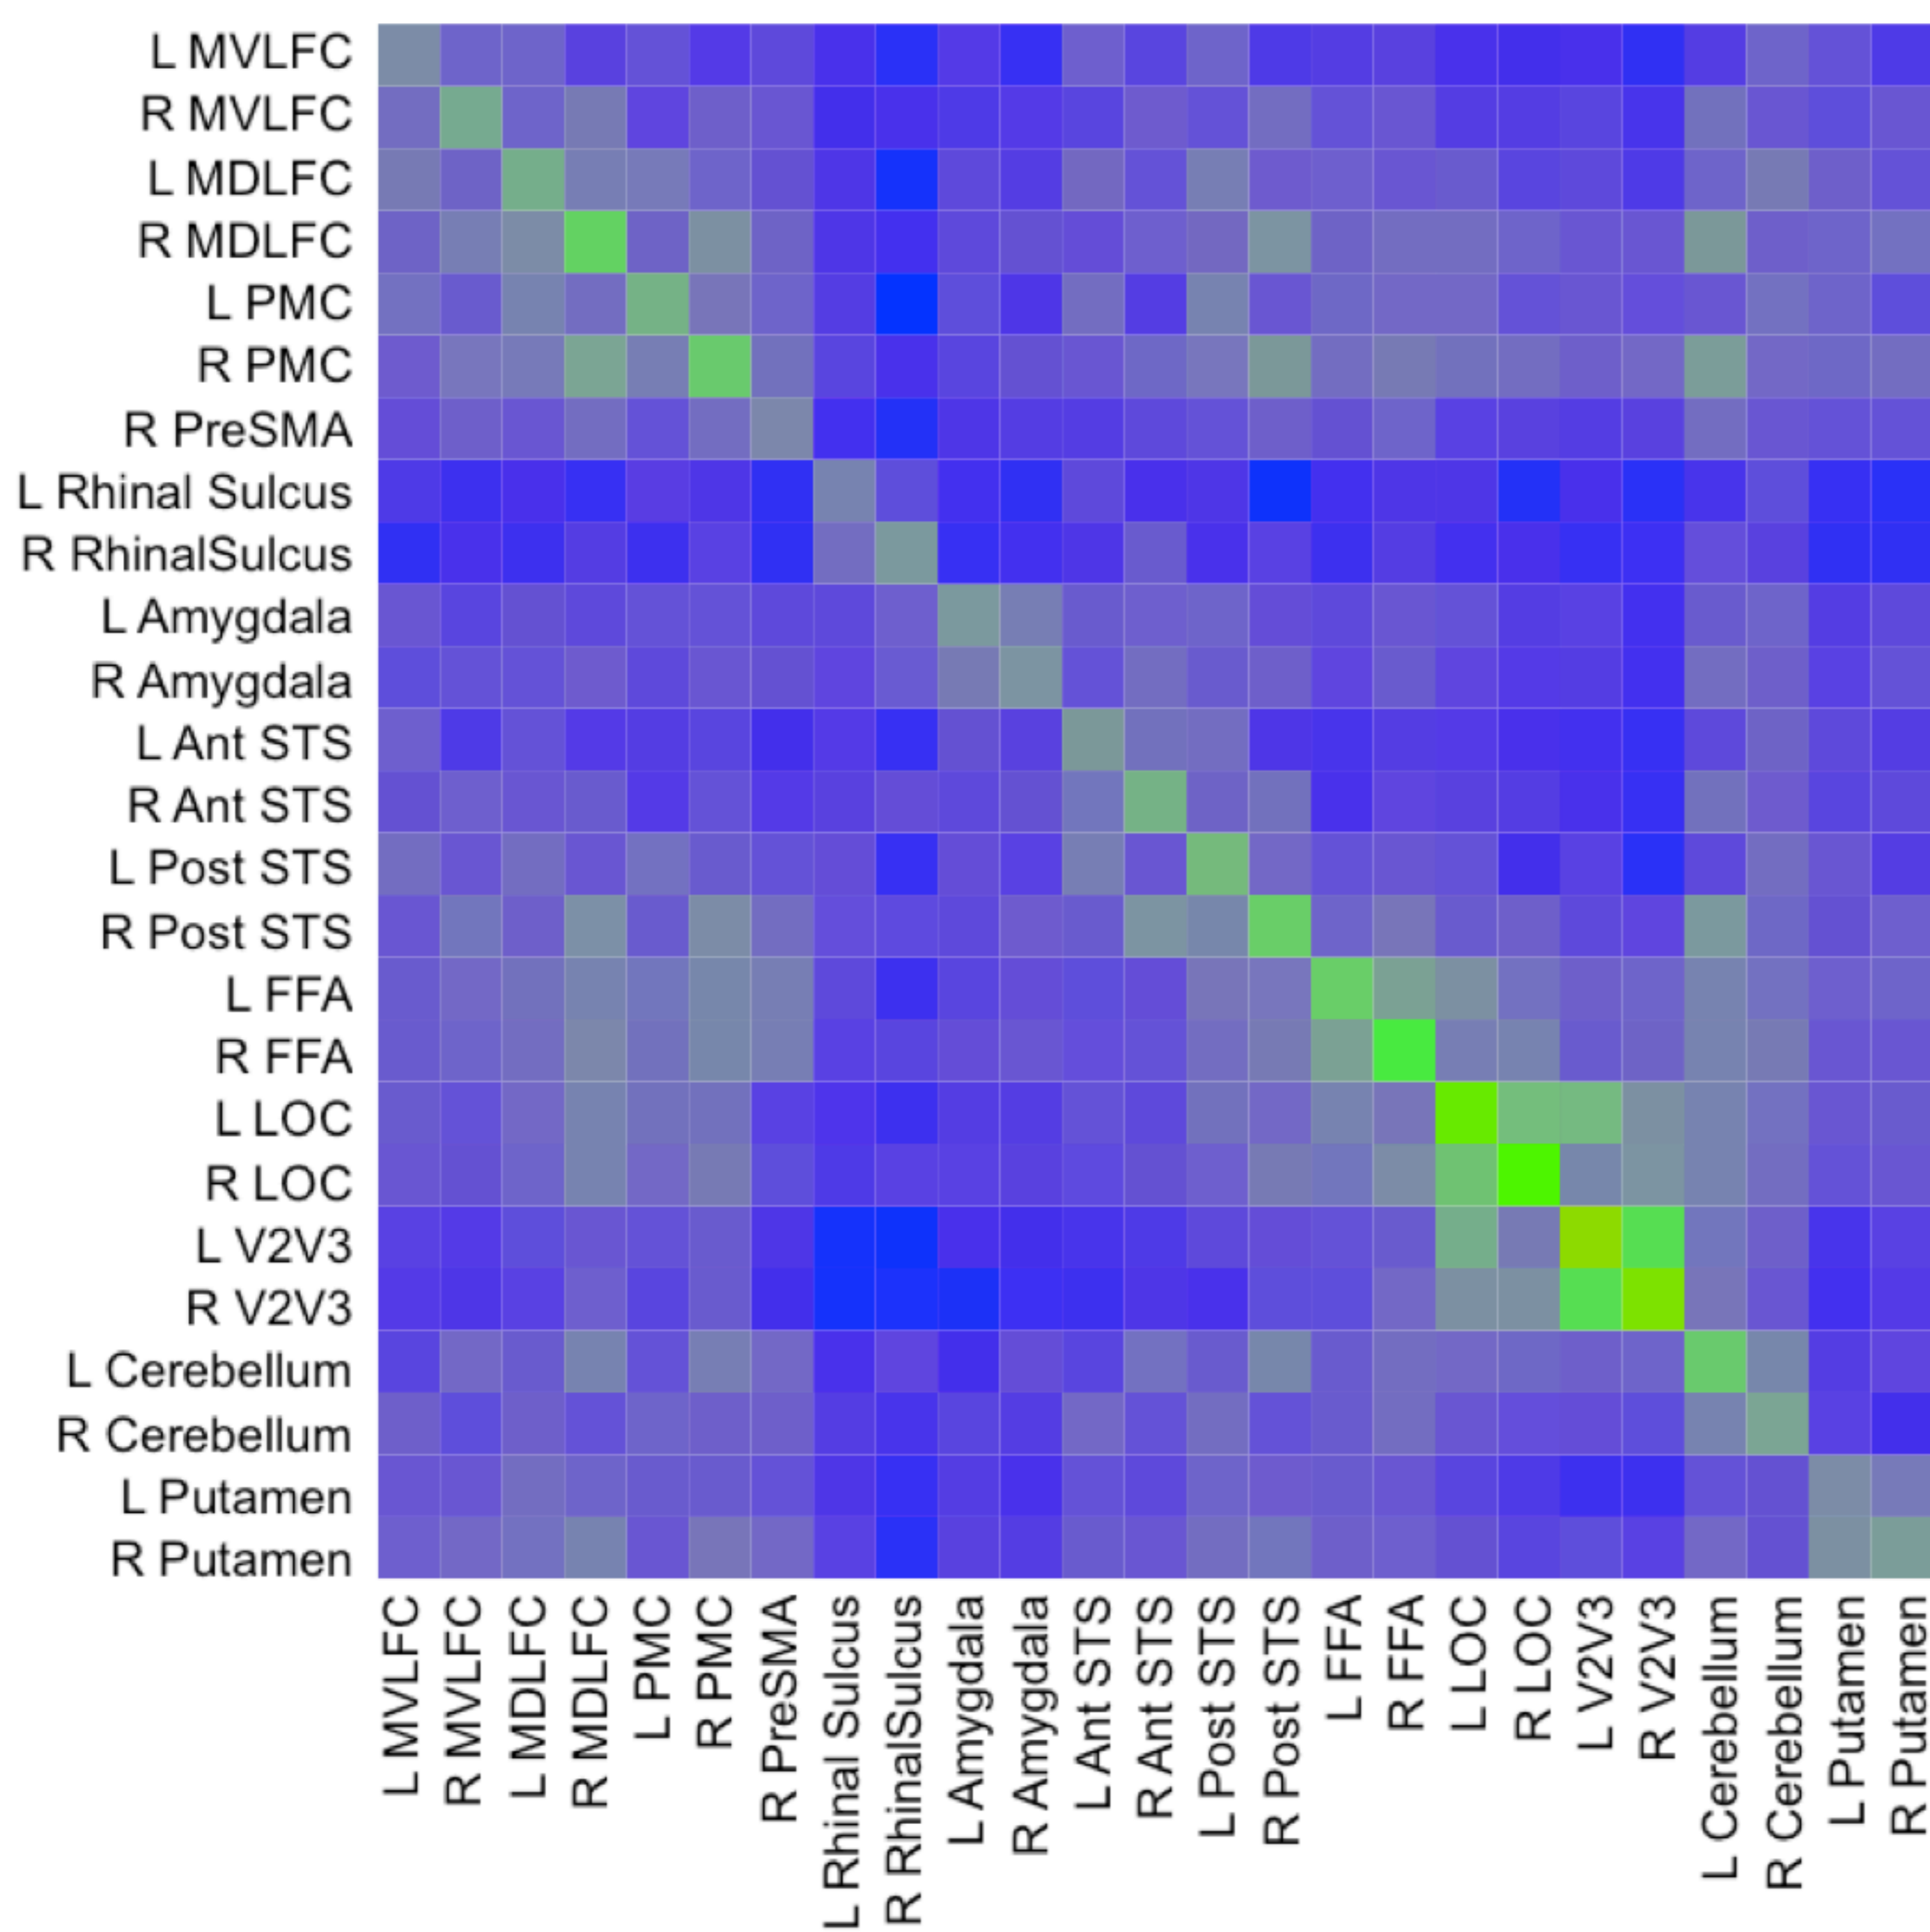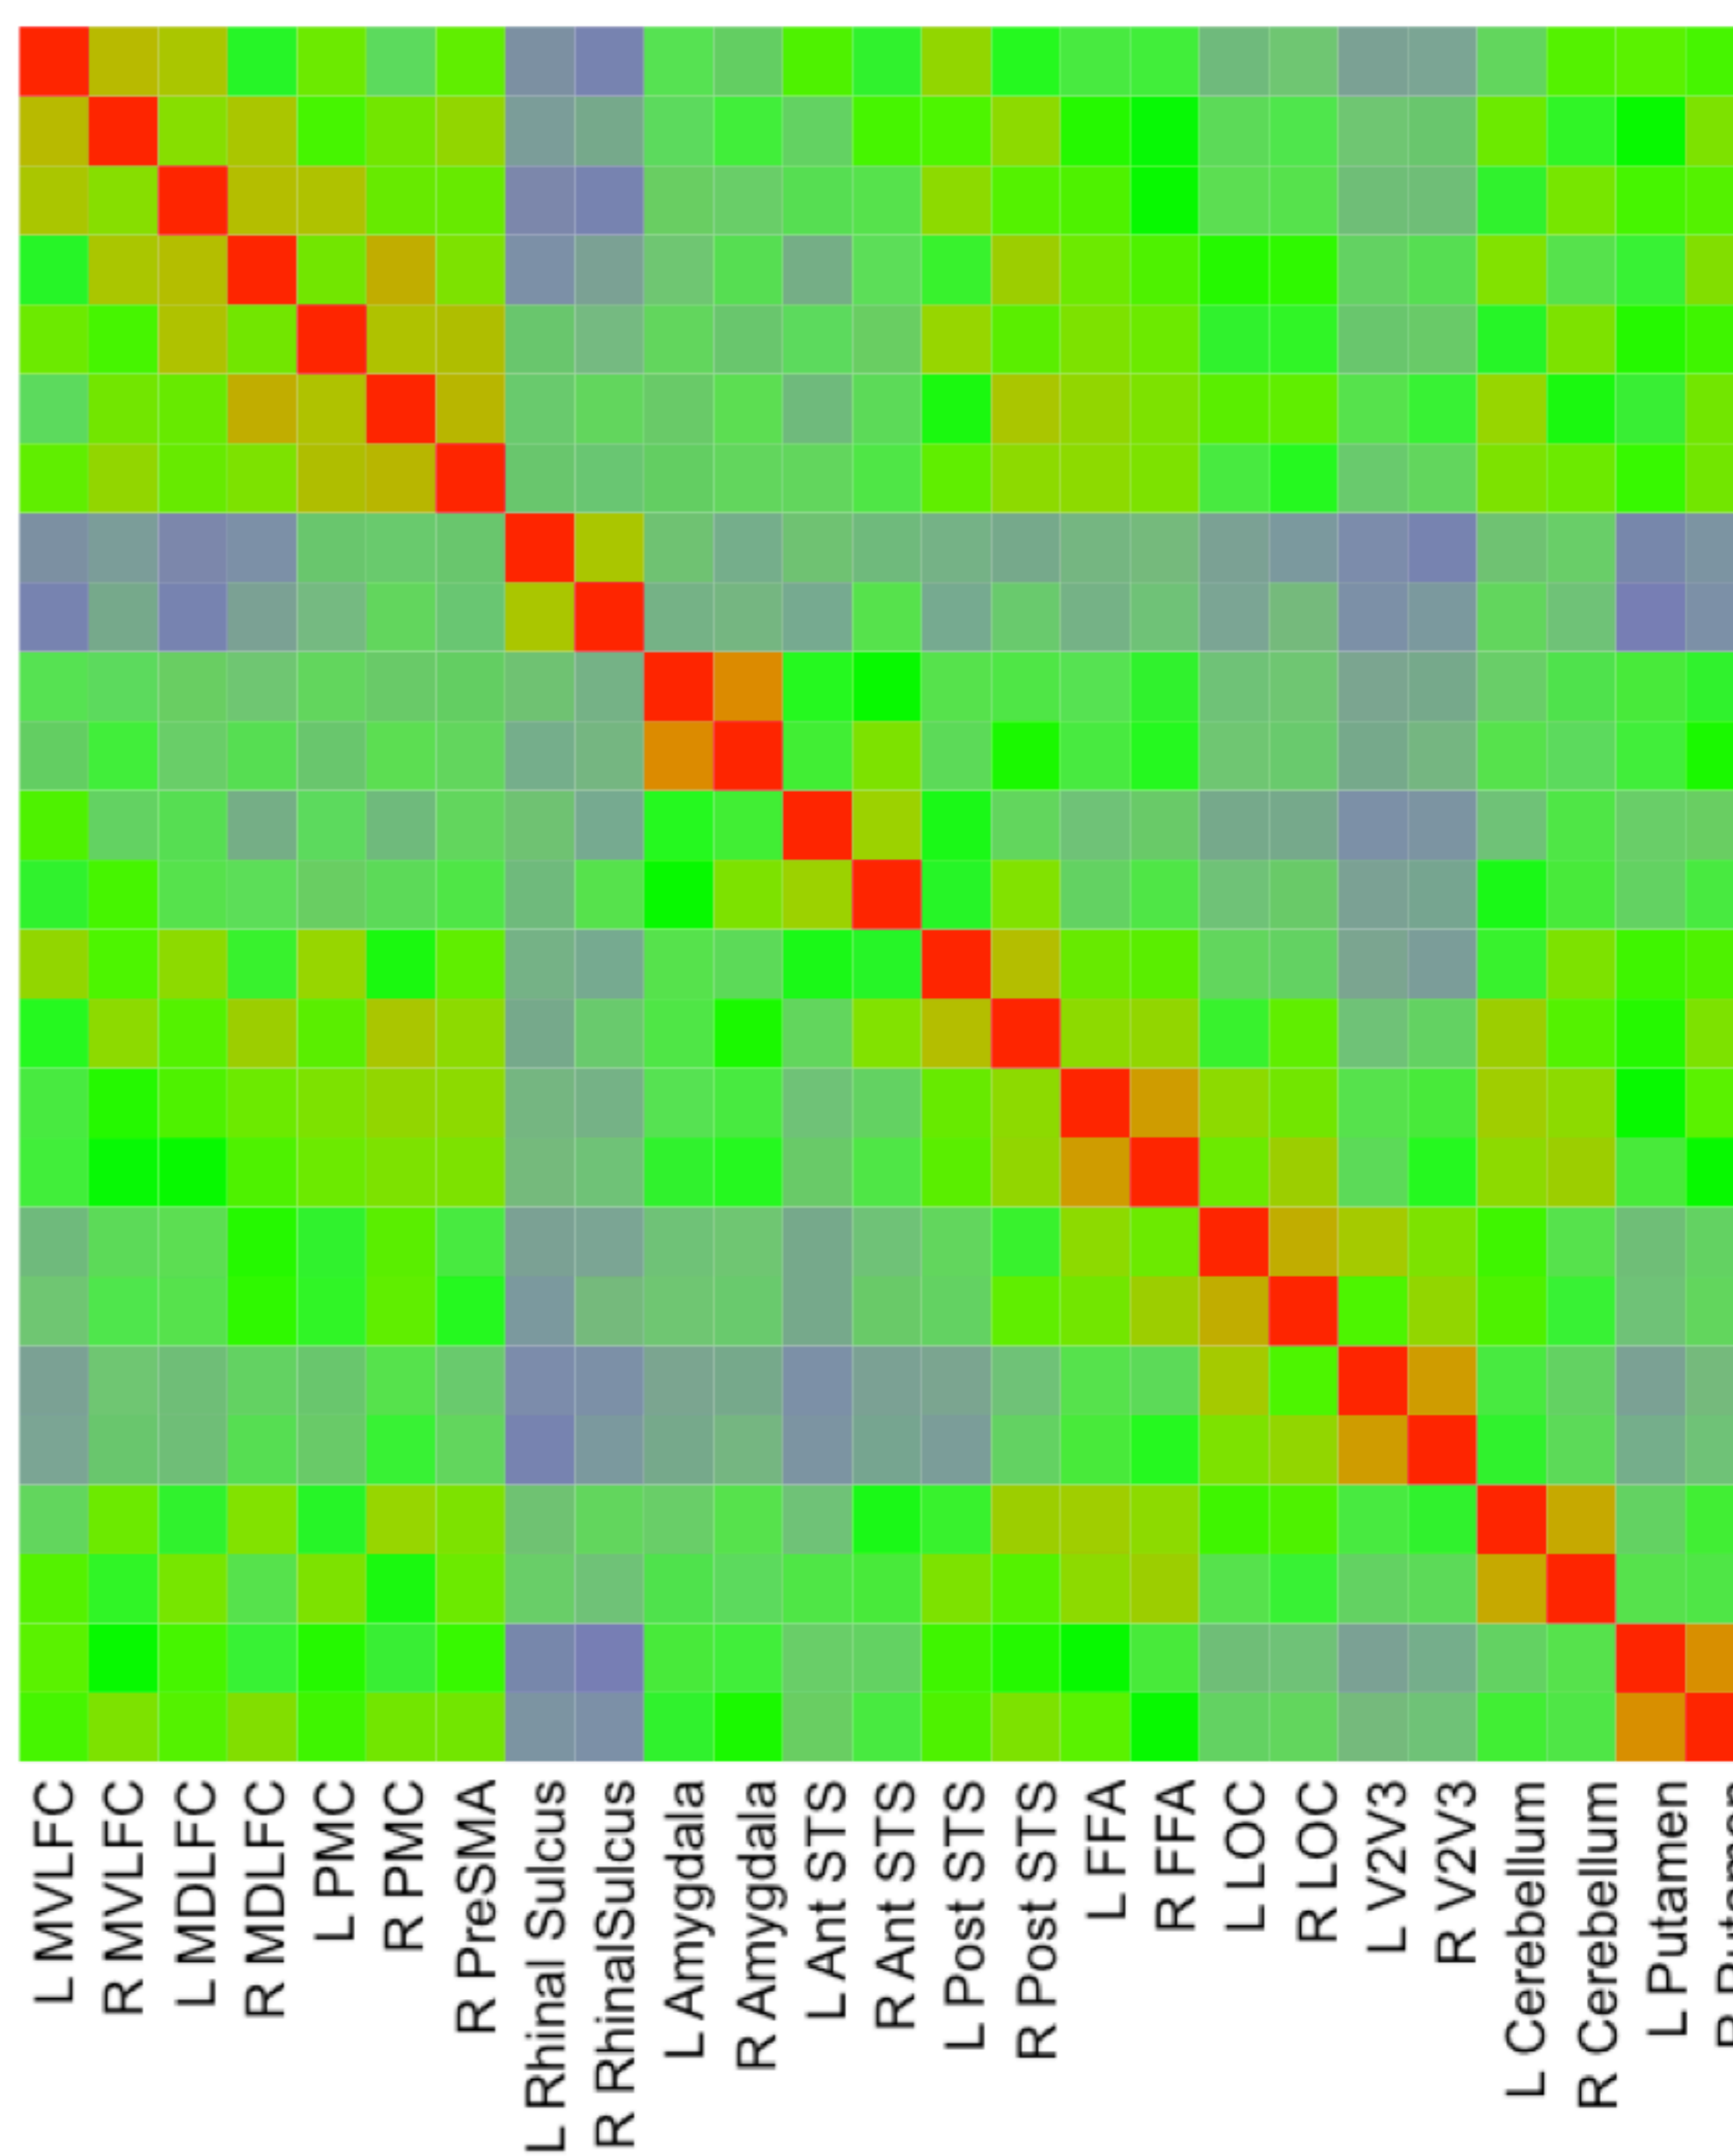

Angry Faces

## Color Key

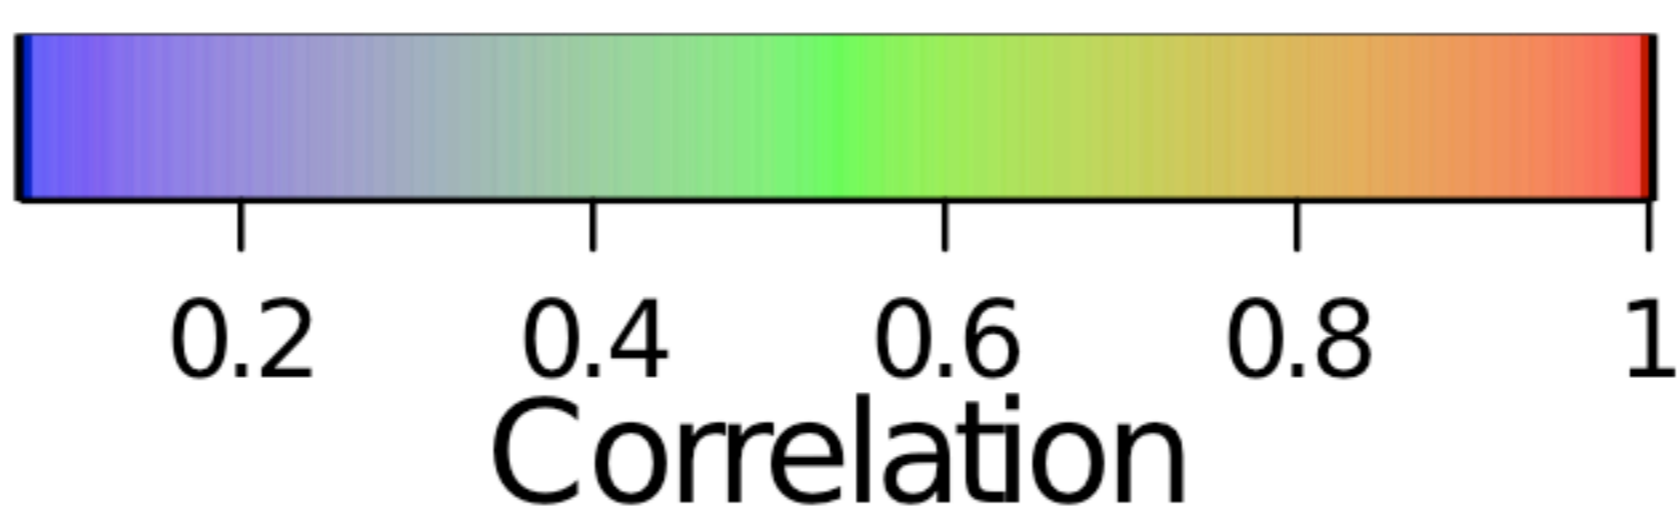

Supplement: pgen.1004523.s001.pdf [file pgen.1004523.s001.pdf]
