# Supplementary material for: Global Genetic Variations Predict Brain Response to Faces
Source: PubMed Central journal article supplement (PMC4133042; doi:10.1371/journal.pgen.1004523), 2014-08-14

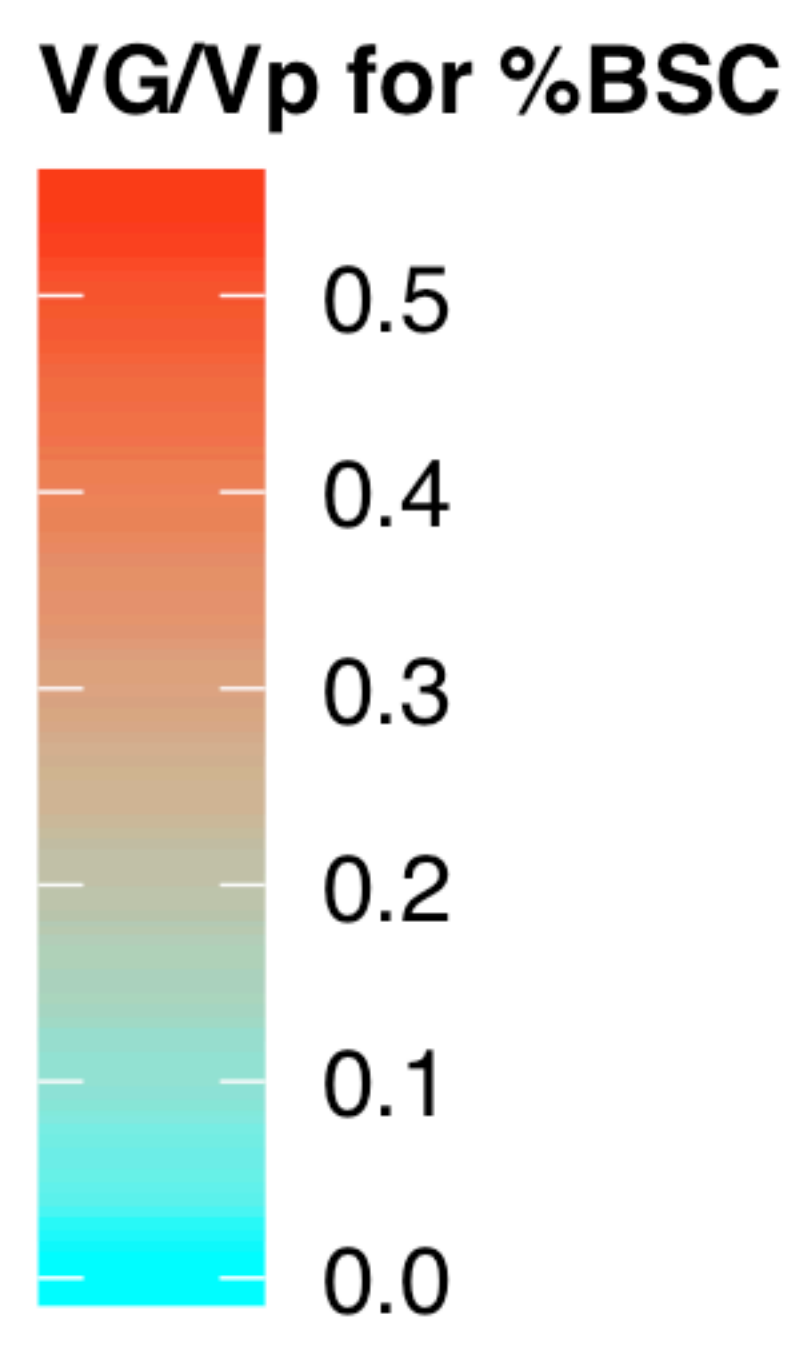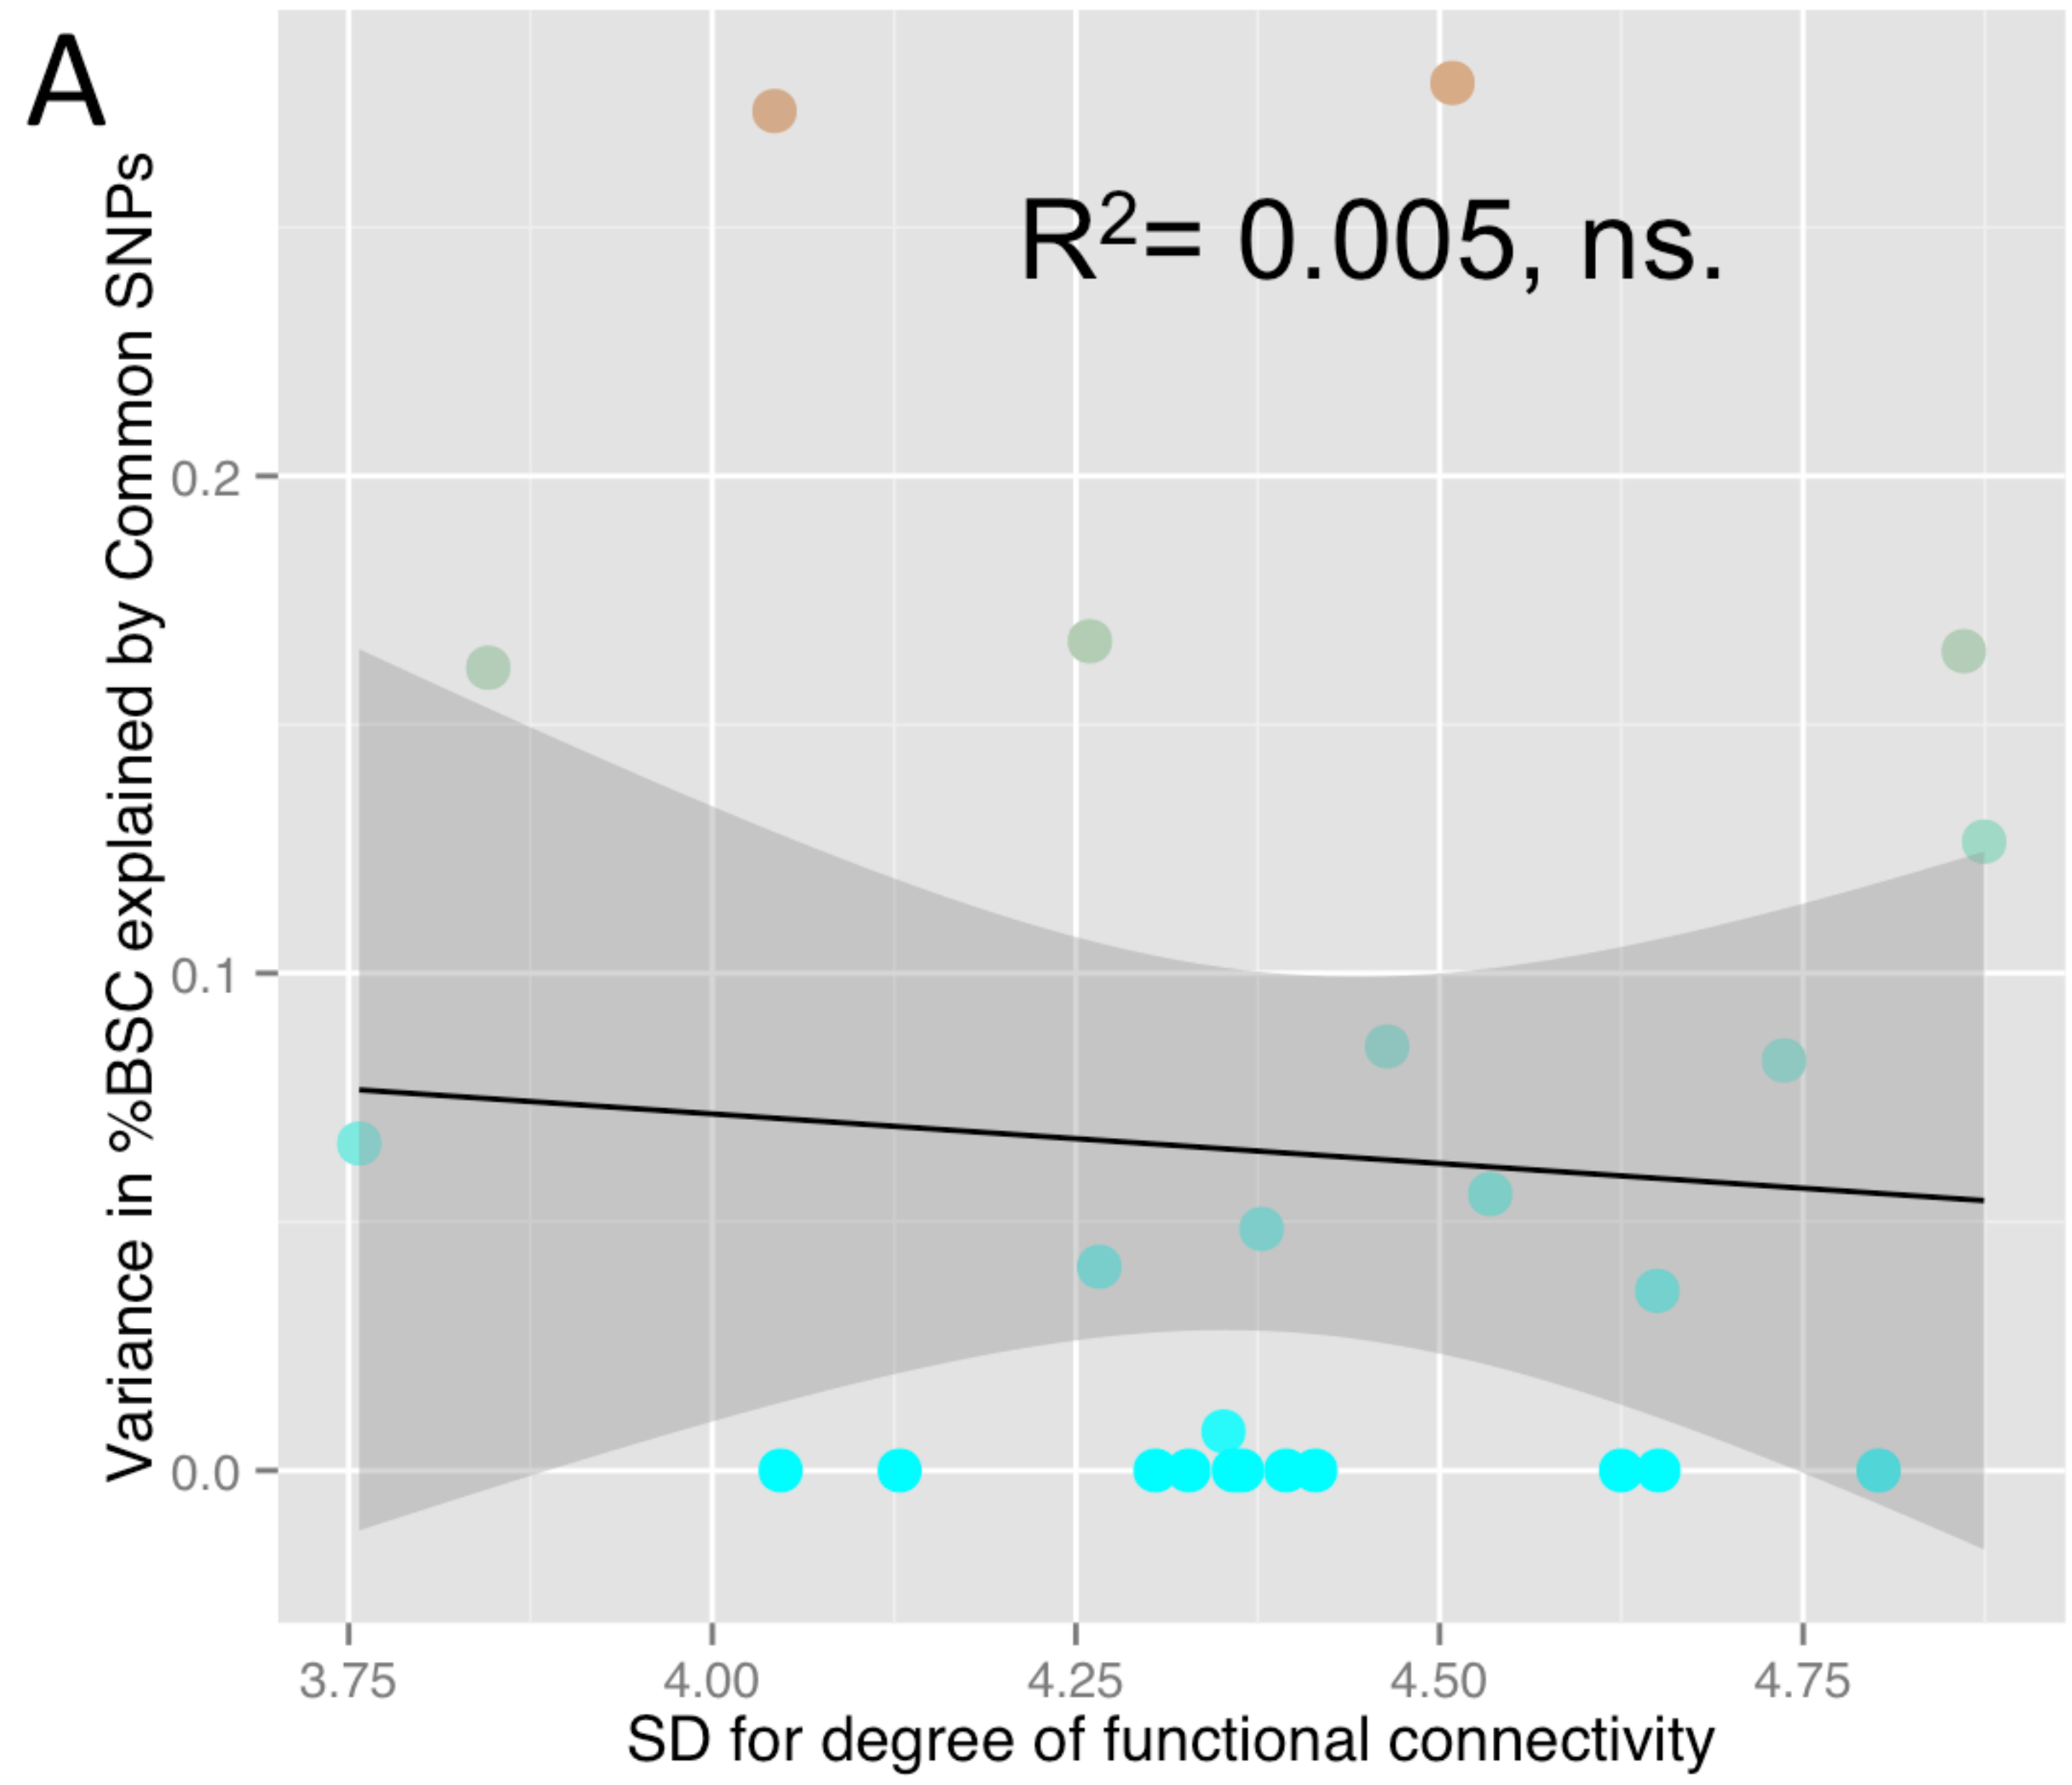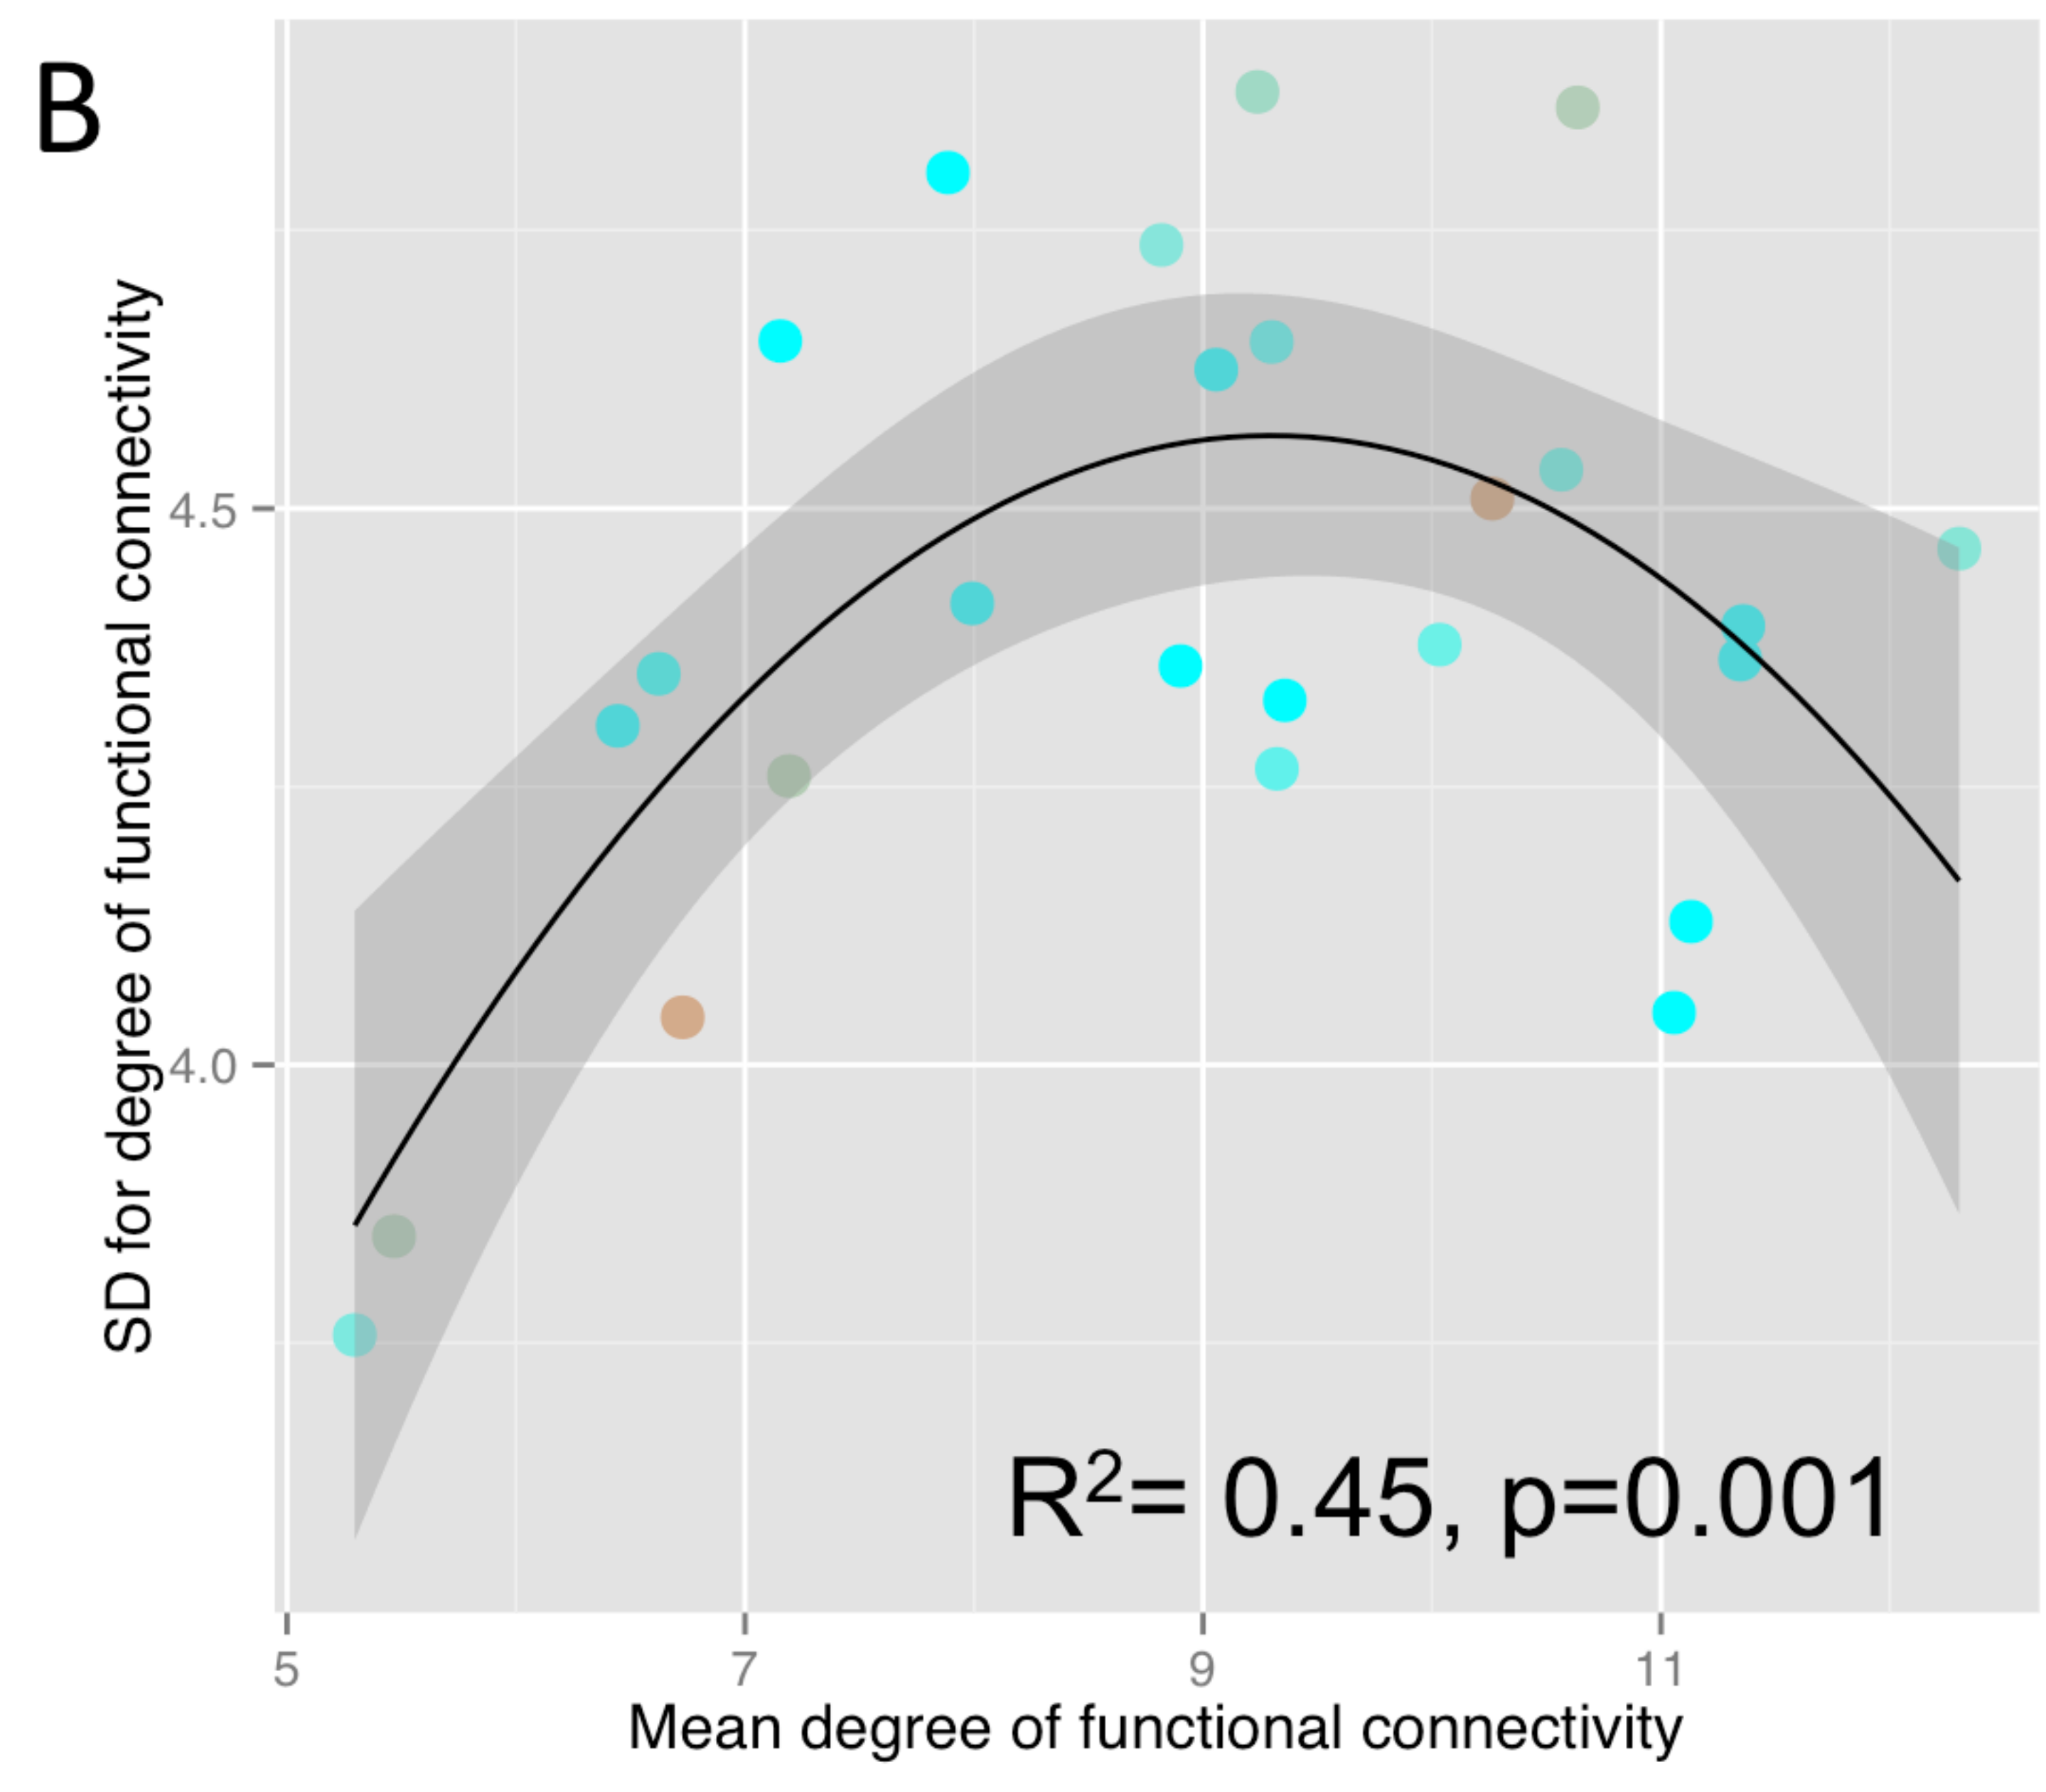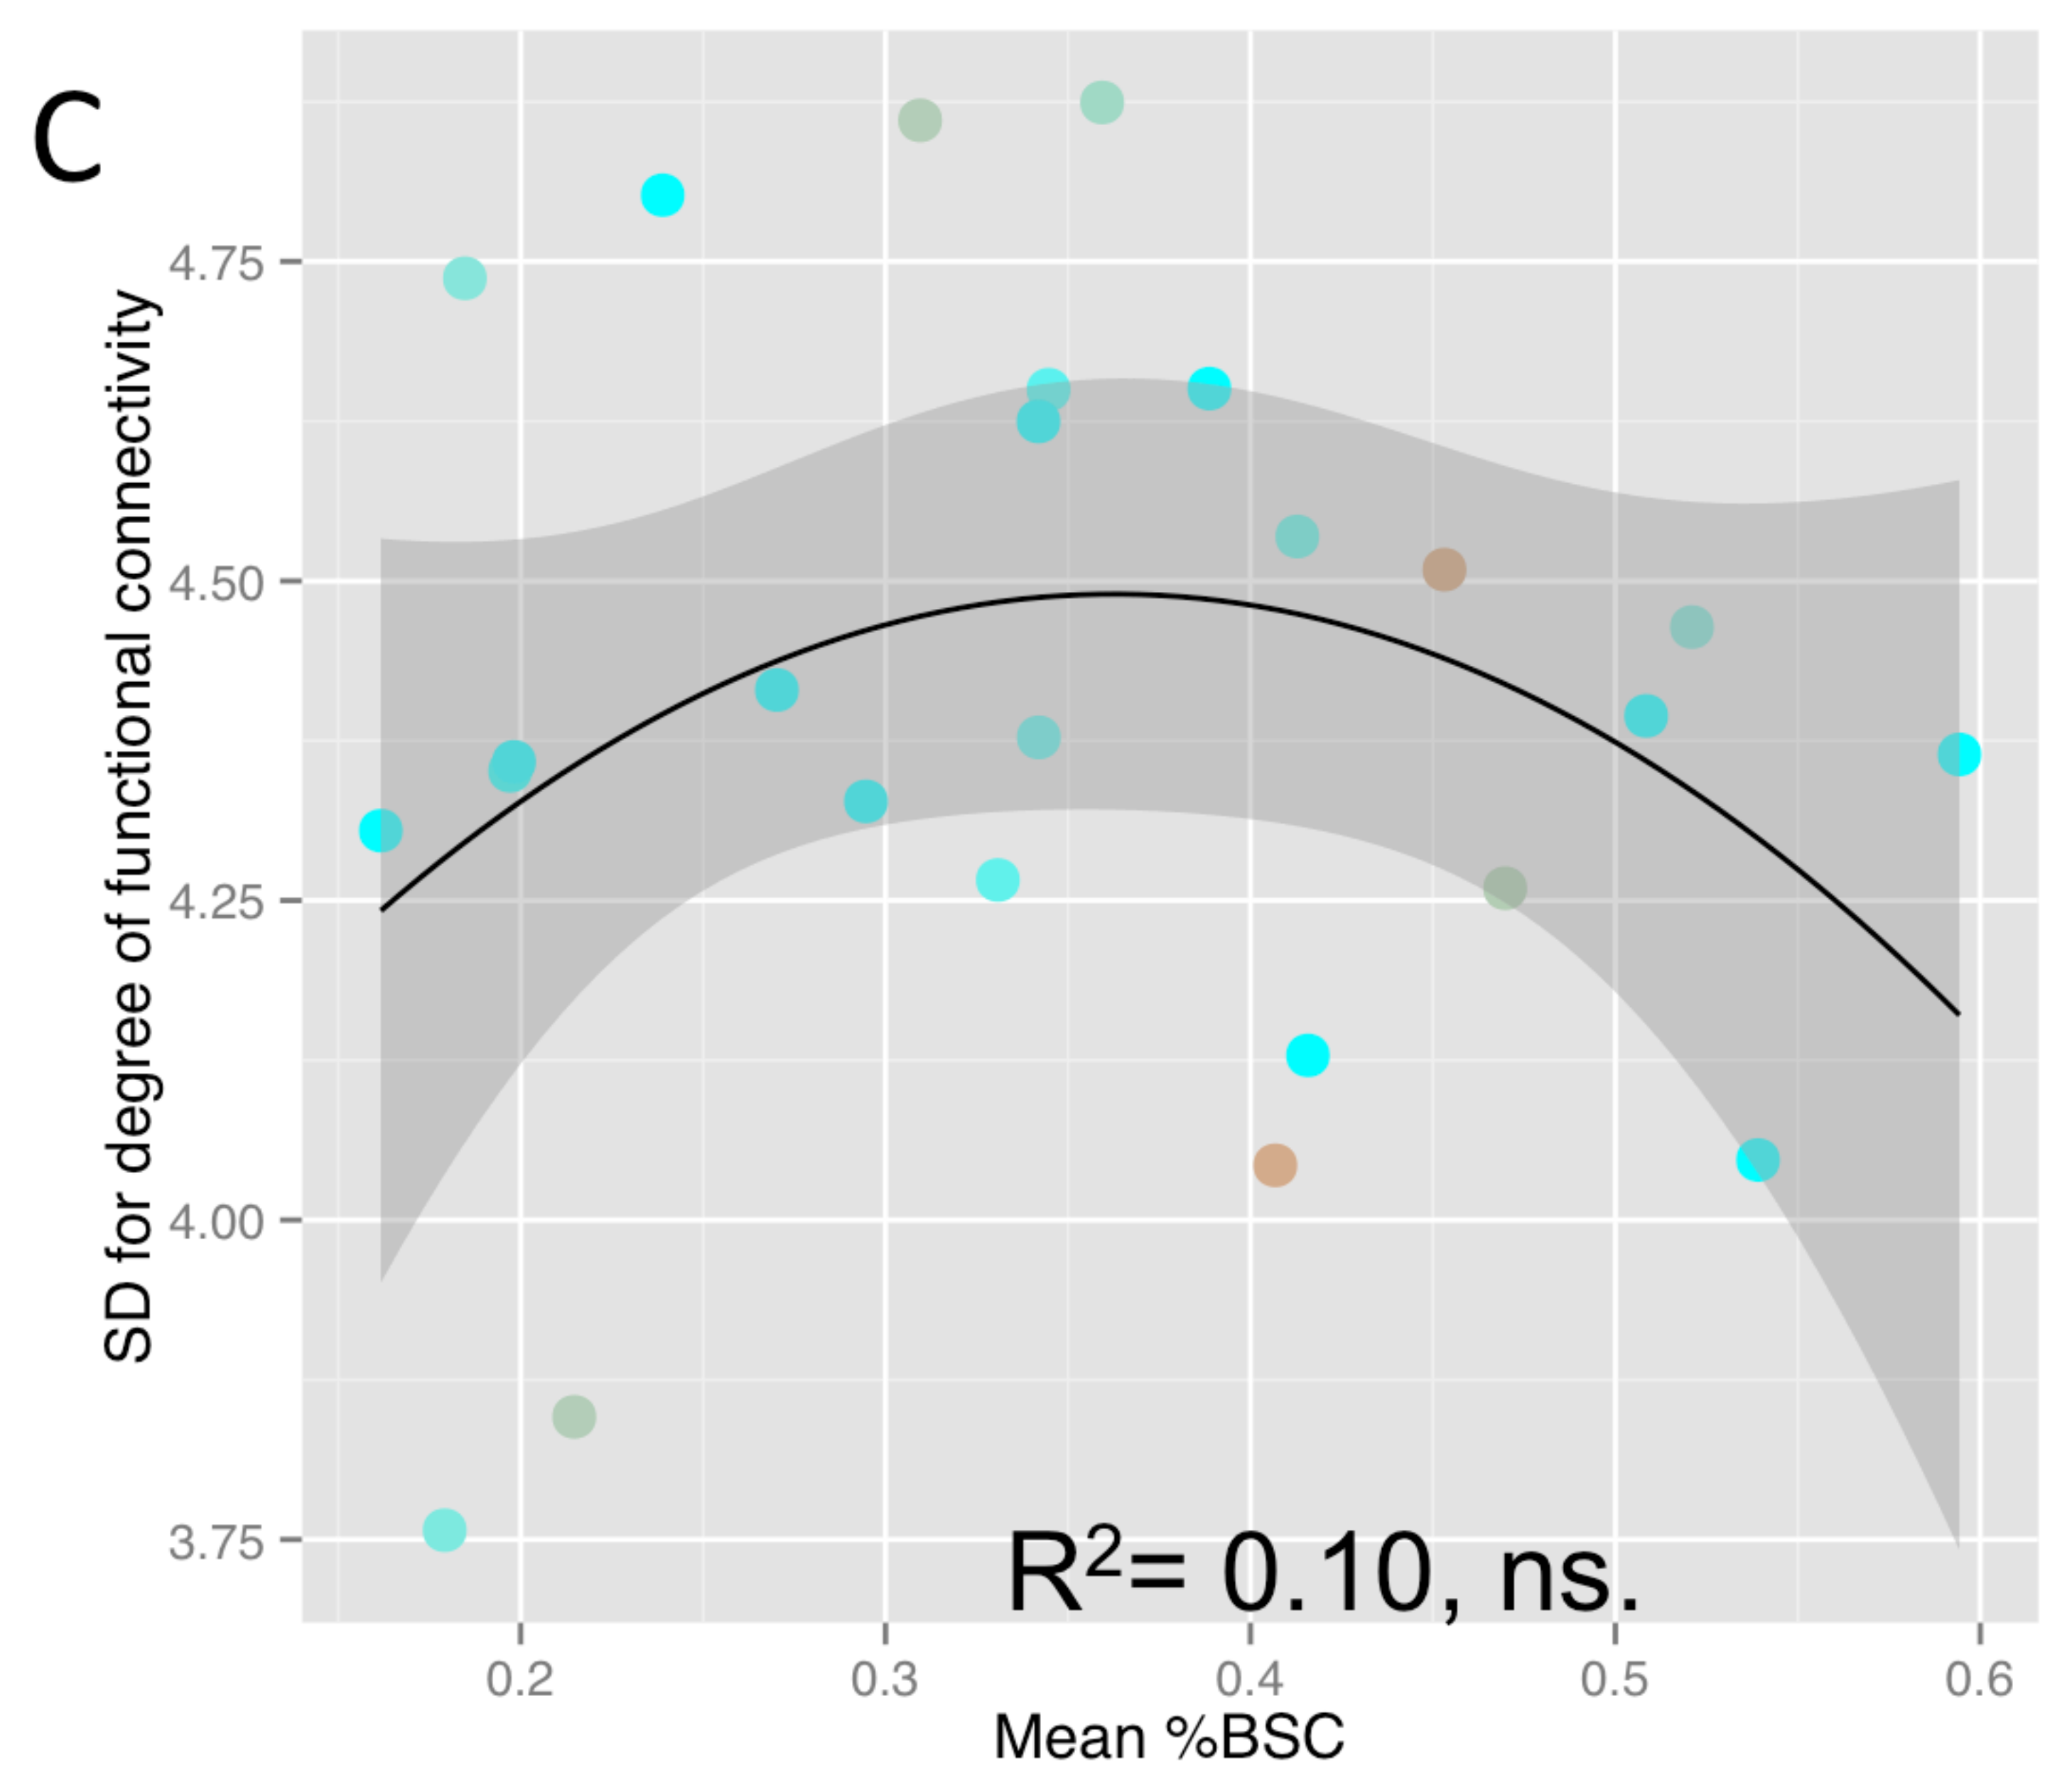

Supplement: pgen.1004523.s002.pdf [file pgen.1004523.s002.pdf]
